# Supplementary material for: Boosting energy storage performance of BiFeO3-based multilayer capacitors via enhancing ionic bonding and relaxor behavior
Source: Royal Society of Chemistry journal article supplement (doi:10.1039/d1ta10971e), 2022-01-01
Supplement: d1ta10971e1.pdf [file d1ta10971e1.pdf]

## Supporting Information

### **Boosting energy storage performance of BiFeO<sub>3</sub>-based multilayer capacitors via enhancing ionic bonding and relaxor behavior**

Li-Feng Zhu<sup>1,4</sup>, Aizhen Song<sup>1</sup>, Bo-Ping Zhang<sup>\*1</sup>, Xiao-Qi Gao<sup>1</sup>, Zhi-Hang Shan<sup>1</sup>, Gao-Lei Zhao<sup>\*3</sup>, Junqi Yuan<sup>1</sup>, Deng Deng<sup>1</sup>, Hailong Shu<sup>1</sup>, Jing-Feng Li<sup>\*2</sup>

<sup>1</sup> School of Materials Science and Engineering, University of Science and Technology Beijing, Beijing 100083, China.

<sup>2</sup> State Key Laboratory of New Ceramics and Fine Processing, School of Materials Science and Engineering, Tsinghua University, Beijing, 100084, China

<sup>3</sup> Institute of Acoustics, Chinese Academy of Sciences, No.21 North 4th Ring Road, Haidian District, 100190, Beijing, China

<sup>4</sup> Foshan (Southern China) Institute for New Materials, Foshan, Guangdong, 528200, China.

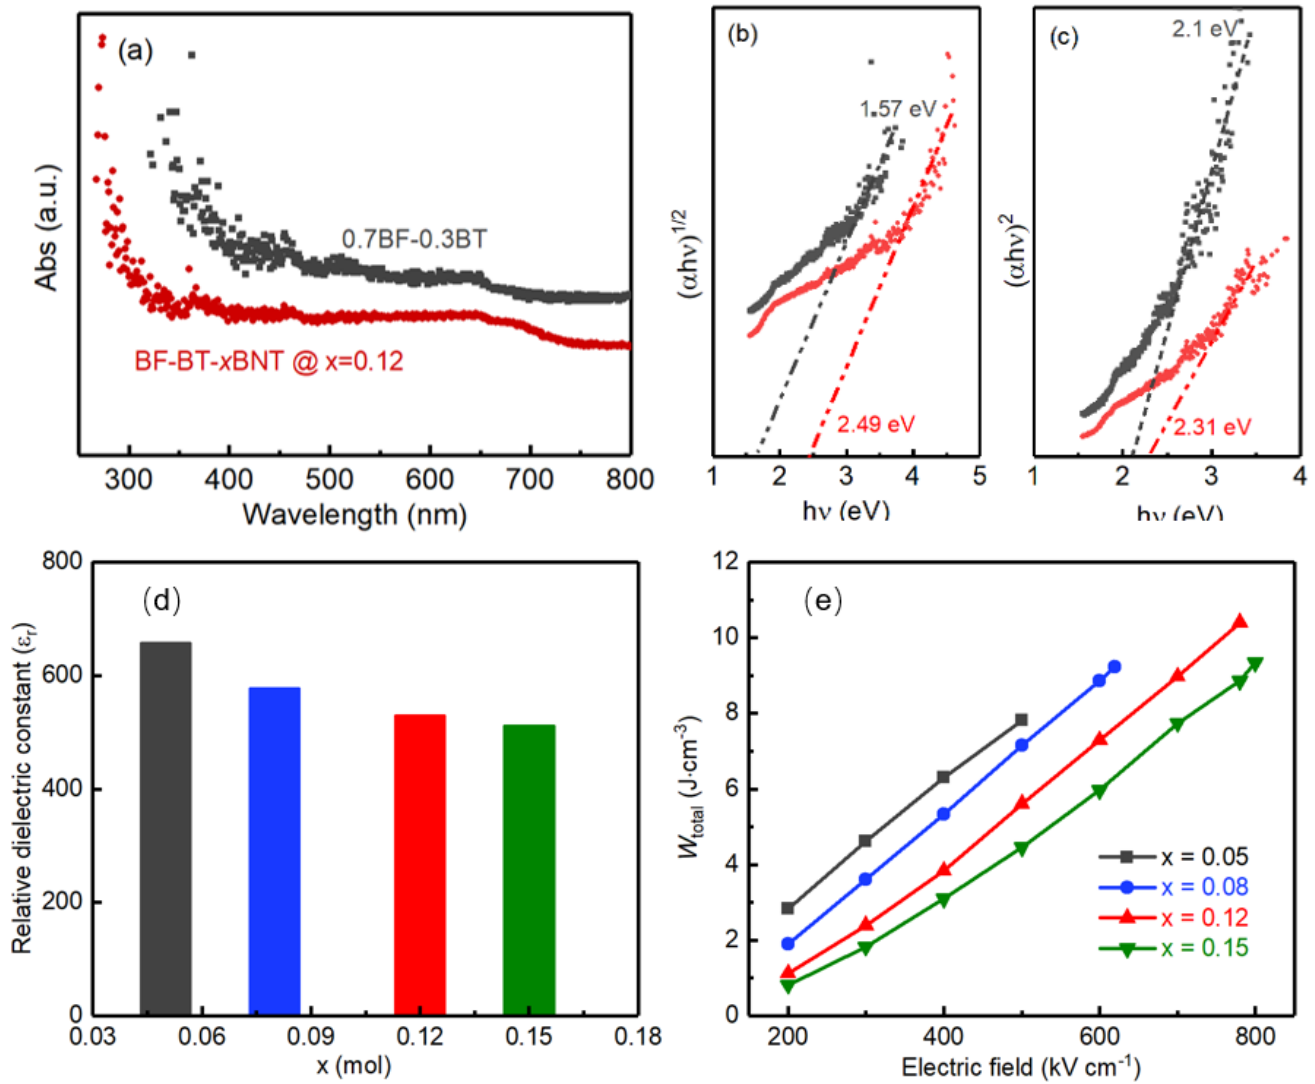

Fig.S1 UV-Vis diffuse reflectance spectra for 0.7BF-0.3BT and BF-BT-0.12NT capacitors (a), the indirect band gap calculated by plots of  $(\alpha hv)^{1/2}$  versus  $h\nu$  (b), and direct band gap calculated by plots of  $(\alpha hv)^2$  versus  $h\nu$  (c) for the for 0.7BF-0.3BT and BF-BT-0.12NT capacitors, relative dielectric constant ( $\epsilon_r$ ) measured at 1 kHz (d) and total energy storage ( $W_{total}$ ) (e) for BF-BT-xNT capacitors

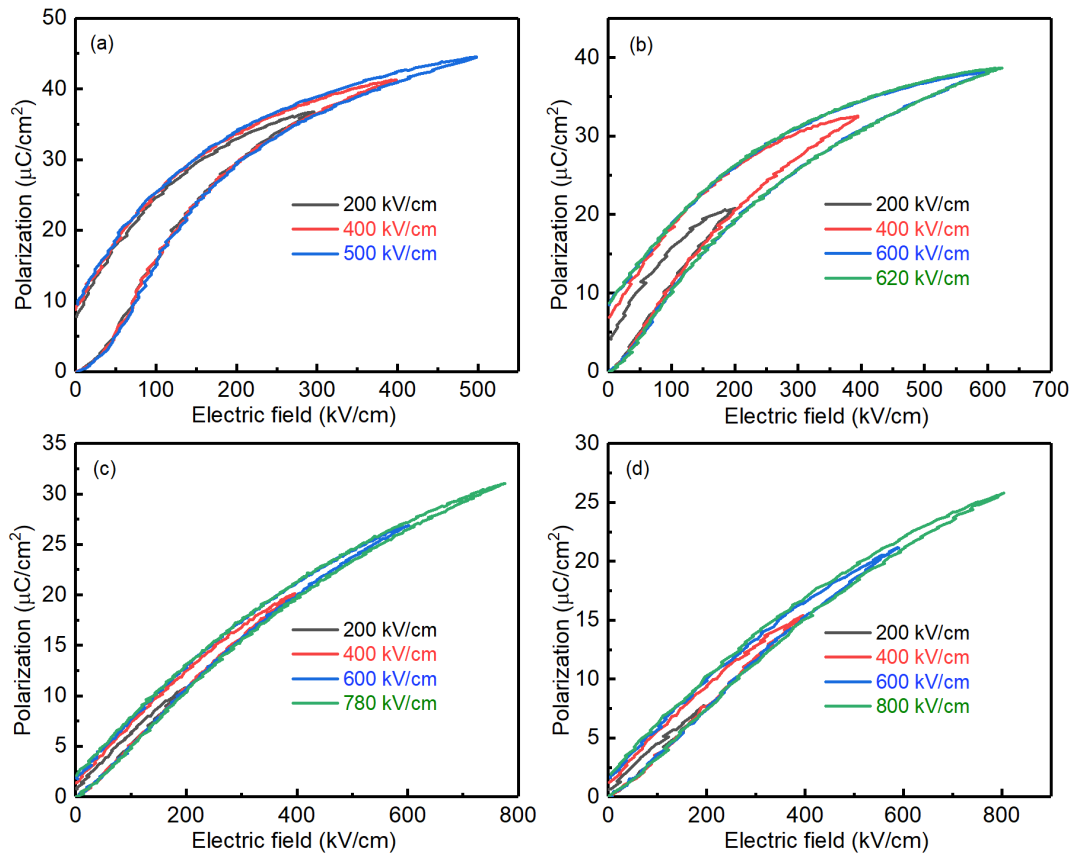

Fig.S2 Unipolar P-E loops for BF-BT-xNT capacitors  $x = 0.05$  (a),  $x = 0.08$  (b),  $x = 0.12$  (c) and  $x = 0.15$  (d)

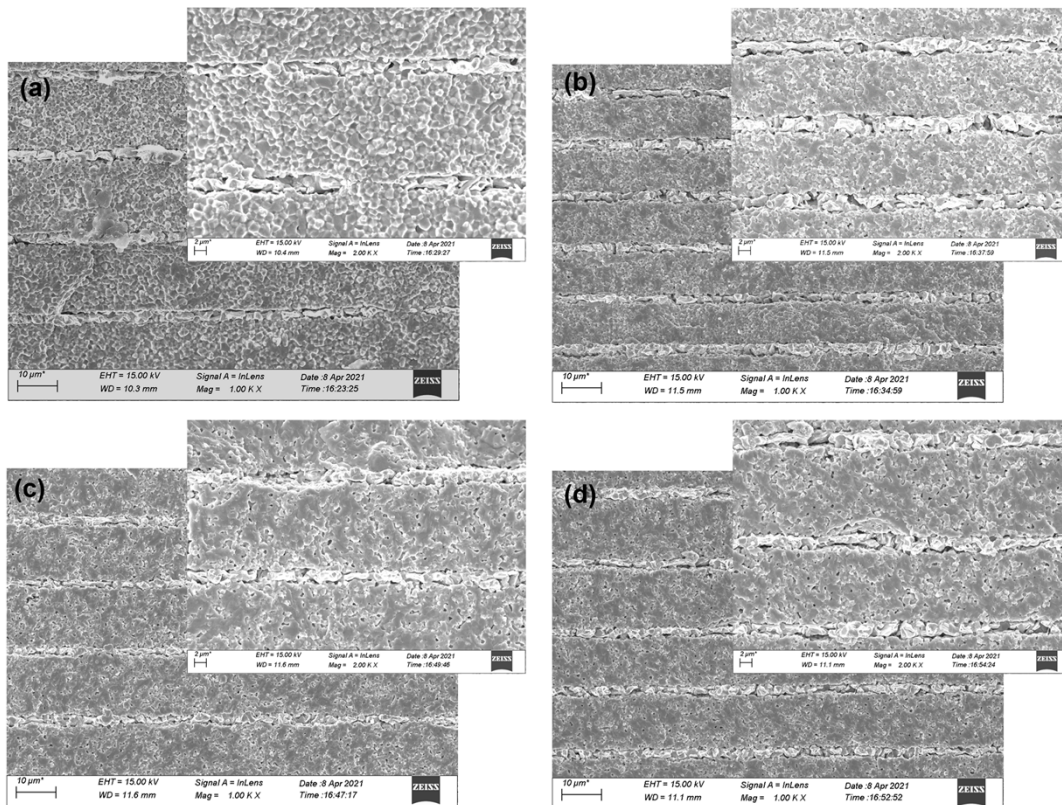

Figure S3 SEM images of the MLCCs for BF-BT-xNT capacitors  $x = 0.05$  (a),  $x = 0.08$  (b),  $x = 0.12$  (c) and  $x = 0.15$  (d)

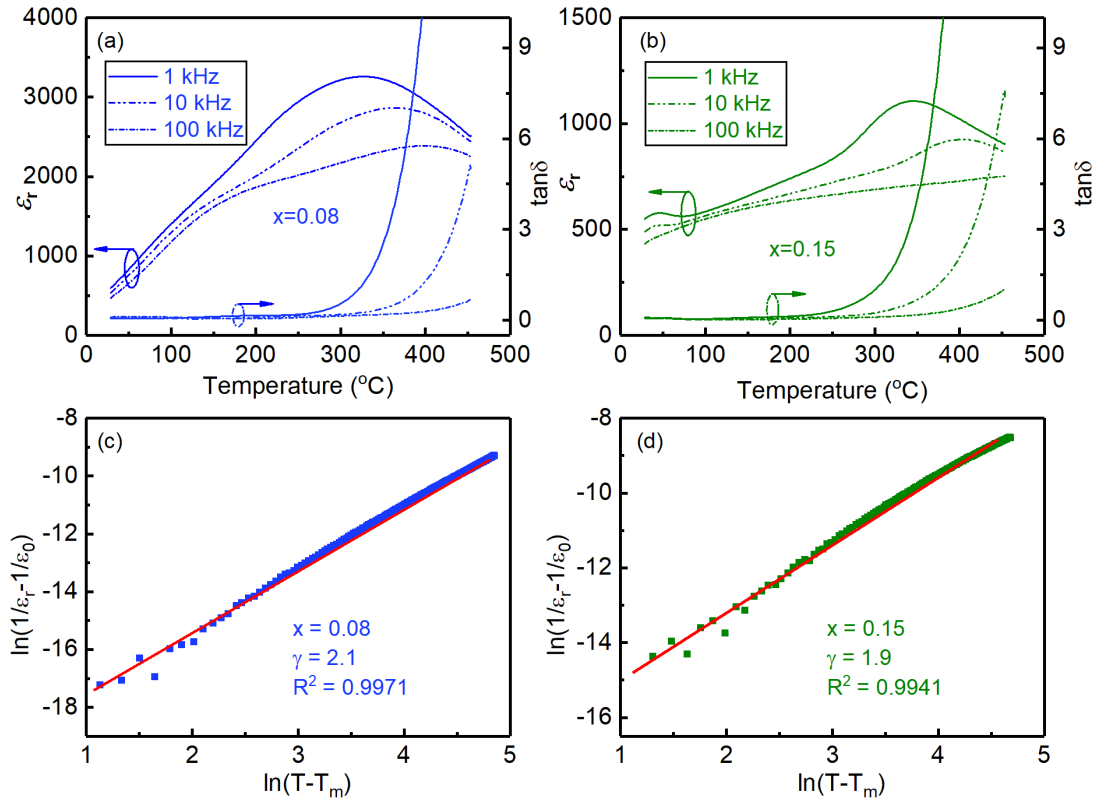

Fig.S4 temperature dependence of the dielectric constant  $\epsilon_r$  and dielectric loss  $\tan\delta$  for the capacitors at  $x=0.08$  (a) and 0.15 (b), plots of  $\ln(1/\epsilon_r - 1/\epsilon_m)$  versus  $\ln(T - T_m)$  at 1 kHz for the corresponding ceramics,  $x = 0.08$  (c) and 0.15 (d)
